# Supplementary material
Source: PubMed Central journal article supplement (PMC7854772)
Supplement: NIHMS1614738-supplement-1.pdf [file NIHMS1614738-supplement-1.pdf]

**Supplementary Table 1. Baseline demographics, surgical details, and outcomes for first-time glaucoma drainage device (GDD) and second-time GDD in pediatric eyes**

| Categorical Variable                                       | Value                                                                                                                                               | First-Time GDD<br>N = 150 Eyes | Second-Time GDD<br>N = 22 Eyes |
|------------------------------------------------------------|-----------------------------------------------------------------------------------------------------------------------------------------------------|--------------------------------|--------------------------------|
| Follow-Up (Mean +/- SD, years)                             | All Patients                                                                                                                                        | 5.4 +/- 4.1                    | 5.5 +/- 3.3                    |
| Sex (n (%))                                                | Male                                                                                                                                                | 73 (48.7%)                     | 13 (59.1%)                     |
|                                                            | Female                                                                                                                                              | 77 (51.3%)                     | 9 (40.9%)                      |
| Race/Ethnicity (n (%))                                     | African American                                                                                                                                    | 13 (8.7%)                      | 5 (22.7%)                      |
|                                                            | Caucasian, Non-Hispanic                                                                                                                             | 19 (12.7%)                     | 3 (13.6%)                      |
|                                                            | Caucasian, Hispanic                                                                                                                                 | 62 (41.3%)                     | 10 (45.5%)                     |
|                                                            | Asian American                                                                                                                                      | 7 (4.7%)                       | 0 (0.0%)                       |
|                                                            | Unknown                                                                                                                                             | 49 (32.7%)                     | 4 (18.2%)                      |
| Eye (n (%))                                                | Right                                                                                                                                               | 79 (52.7%)                     | 12 (54.6%)                     |
|                                                            | Left                                                                                                                                                | 71 (47.3%)                     | 10 (45.5%)                     |
| Pre-Operative IOP (Mean +/- SD, mmHg)                      | All Eyes                                                                                                                                            | 32.8 +/- 9.5                   | 27.6 +/- 8.5                   |
|                                                            | Failure Eyes                                                                                                                                        | 33.9 +/- 10                    | 24.3 +/- 7.2                   |
| Concurrent Procedure with GDD Implantation (n (%))         | Retina Procedure, Retina Procedure with Anterior Segment Procedure, Anterior Segment Procedure, Glaucoma-Related Surgery ± Anterior Segment Surgery | 53 (36.3%)                     | 9 (42.9%)                      |
| Pre-Operative Number of Glaucoma Medications (Mean +/- SD) | All Eyes                                                                                                                                            | 3.0 +/- 1.2                    | 3.4 +/- 1.5                    |
|                                                            | Failure Eyes                                                                                                                                        | 2.6 +/- 1.0                    | 1.7 +/- 0.5                    |
| Age at Surgery (Mean +/- SD, years)                        | All Eyes                                                                                                                                            | 7.3 +/- 5.7                    | 7.4 +/- 5.6                    |
|                                                            | Failure Eyes                                                                                                                                        | 4.5 +/- 5.2                    | 6.8 +/- 5.7                    |
| Type of Implant (n (%))                                    | Ahmed                                                                                                                                               | 37 (24.8%)                     | 3 (13.6%)                      |
|                                                            | Baerveldt                                                                                                                                           | 112 (75.2%)                    | 19 (86.4%)                     |
|                                                            | Molteno                                                                                                                                             | 1 (0.7%)                       | 0 (0.0%)                       |
|                                                            |                                                                                                                                                     |                                |                                |
| Tube Location (n (%))                                      | Anterior Chamber                                                                                                                                    | 96 (64%)                       | 14 (63.6%)                     |
|                                                            | Sulcus                                                                                                                                              | 12 (8.0%)                      | 3 (13.6%)                      |
|                                                            | Pars Plana                                                                                                                                          | 42 (28.0%)                     | 5 (22.7%)                      |
| Type of Glaucoma (n (%))                                   | Glaucoma following cataract surgery                                                                                                                 | 31 (20.7%)                     | 3 (13.6%)                      |
|                                                            | Glaucoma associated with non-acquired systemic disease or syndrome                                                                                  | 16 (10.7%)                     | 7 (31.8%)                      |
|                                                            | Glaucoma associated with non-acquired ocular anomalies                                                                                              | 22 (14.7%)                     | 3 (13.6%)                      |
|                                                            | Glaucoma associated with acquired conditions                                                                                                        | 38 (25.3%)                     | 1 (4.6%)                       |
|                                                            | Primary Congenital Glaucoma                                                                                                                         | 40 (26.7%)                     | 8 (36.4%)                      |
| Lens Status (n (%))                                        | Juvenile Open Angle Glaucoma                                                                                                                        | 3 (2.0%)                       | 0 (0.0%)                       |
|                                                            | Phakic                                                                                                                                              | 90 (60.8%)                     | 15 (68.2%)                     |
| Endpoint Outcomes (n (%))                                  | Pseudophakic or Aphakic                                                                                                                             | 58 (39.2%)                     | 7 (31.8%)                      |
|                                                            | Failure                                                                                                                                             | 58 (38.7%)                     | 11 (50%)                       |
|                                                            | Complete Success                                                                                                                                    | 20 (13.3%)                     | 2 (9.1%)                       |
| Failure Reason (n (%))                                     | Qualified Success                                                                                                                                   | 72 (48%)                       | 9 (40.9%)                      |
|                                                            | NLP Vision                                                                                                                                          | 4 (6.9%)                       | 4 (36.4%)                      |
|                                                            | IOP >21mmHg on 2 consecutive visits after 3 months                                                                                                  | 22 (37.9%)                     | 4 (36.4%)                      |
|                                                            | IOP reduction <20% (or IOP <5mmHg) below baseline at 2 consecutive visits after 3 months                                                            | 0 (0.0%)                       | 0 (0.0%)                       |
| Survival (Mean +/- SD, months)                             | Reoperation for Glaucoma                                                                                                                            | 32 (55.2%)                     | 3 (27.2%)                      |
|                                                            | Failure                                                                                                                                             | 47 +/- 51                      | 35 +/- 30                      |
|                                                            | Complication (all patients)                                                                                                                         | 31 +/- 42                      | Data Excluded                  |

**Footnote:**

- A “complete success” was defined as an eye that had not failed and did not receive supplemental medical therapy at the end of study period. A “qualified success” was defined as an eye that had not failed and required IOP-lowering medications at the end of the study period.
- Complication survival analysis was not performed on Second-Time GDD eyes due to low power
