# Supplementary material
Source: PubMed Central journal article supplement (PMC7854772)
Supplement: NIHMS1614738-supplement-2.pdf [file NIHMS1614738-supplement-2.pdf]

**Supplementary Table 2. Hazard Ratios (HR), 95% Confidence Intervals (CI), and P-values for first-time glaucoma drainage device (GDD) failures and complications as well as second-time GDD failures in pediatric eyes**

| Variable              | Groups Compared                                                                                            | First-Time GDD Failure     |           |      |           | First-Time GDD Complications |           |      |           | Second-Time GDD Failure                        |           |                       |                 |
|-----------------------|------------------------------------------------------------------------------------------------------------|----------------------------|-----------|------|-----------|------------------------------|-----------|------|-----------|------------------------------------------------|-----------|-----------------------|-----------------|
|                       |                                                                                                            | Hazard Ratio               | HR 95% CI |      | p - value | Hazard Ratio                 | HR 95% CI |      | p - value | Hazard Ratio                                   | HR 95% CI |                       | p - value       |
|                       |                                                                                                            |                            | low       | high |           |                              | low       | high |           |                                                | low       | high                  |                 |
| Categorical Variables | HR is for a change from the first category to the second category                                          |                            |           |      |           |                              |           |      |           |                                                |           |                       |                 |
| Eye                   | Right to Left                                                                                              | 1.3                        | 0.71      | 2.5  | 0.37      | 1.1                          | 0.56      | 2.0  | 0.85      | 0.48                                           | 0.12      | 1.9                   | 0.30            |
| Sex                   | Male to Female                                                                                             | 1.1                        | 0.46      | 2.6  | 0.85      | 1.4                          | 0.73      | 2.7  | 0.31      | 0.42                                           | 0.090     | 2.0                   | 0.27            |
| Race/Ethnicity        | African American to Caucasian, Non-Hispanic                                                                | 0.99                       | 0.15      | 6.3  | 0.99      | 5.9                          | 0.69      | 50   | 0.11      | 7.0                                            | 0.12      | 43 x 10 <sup>^1</sup> | 0.35            |
|                       | African American to Hispanic American                                                                      | 1.2                        | 0.25      | 5.8  | 0.82      | 6.0                          | 0.76      | 47   | 0.089     | 6.7                                            | 0.21      | 220                   | 0.28            |
|                       | African American to Asian American                                                                         | No Asian-American Failures |           |      |           | 3.9                          | 0.23      | 69   | 0.35      | No Asian-American Failures                     |           |                       |                 |
|                       | Caucasian, Non-Hispanic to Hispanic American                                                               | 1.2                        | 0.29      | 5.1  | 0.79      | 1.0                          | 0.40      | 2.6  | 0.98      | 0.95                                           | 0.040     | 23                    | 0.98            |
|                       | Caucasian, Non-Hispanic to Asian American                                                                  | No Asian-American Failures |           |      |           | 0.67                         | 0.080     | 6.0  | 0.72      | No Asian-American Failures                     |           |                       |                 |
|                       | Hispanic American to Asian American                                                                        | No Asian-American Failures |           |      |           | 0.66                         | 0.083     | 5.3  | 0.70      | No Asian-American Failures                     |           |                       |                 |
| Concurrent Procedure  | No to Yes                                                                                                  | 1.1                        | 0.45      | 2.6  | 0.86      | 0.85                         | 0.42      | 1.7  | 0.66      | 2.6                                            | 0.74      | 8.7                   | 0.14            |
|                       | NONE to Retina Procedure Only                                                                              | 0.74                       | 0.21      | 2.6  | 0.64      | 1.0                          | 0.40      | 2.5  | 0.99      | 1.9                                            | 0.33      | 11                    | 0.48            |
|                       | NONE to Retina + Anterior Segment Procedure                                                                | 1.4                        | 0.37      | 5.4  | 0.62      | 0.73                         | 0.22      | 2.5  | 0.62      | No Retina + Anterior Segment Failures          |           |                       |                 |
|                       | NONE to Anterior Segment Procedure                                                                         | 2.7                        | 0.23      | 32   | 0.42      | 1.1                          | 0.14      | 8.1  | 0.96      | 1.4                                            | 0.23      | 7.9                   | 0.73            |
|                       | NONE to Glaucoma-Related Surgery ± Anterior Segment Surgery                                                | 1.2                        | 0.18      | 7.5  | 0.88      | 0.50                         | 0.066     | 3.7  | 0.50      | 13                                             | 1.9       | 93                    | <b>0.0085**</b> |
|                       | Retina Procedure Only to Retina + Anterior Segment Procedure                                               | 1.9                        | 0.36      | 10   | 0.44      | 0.74                         | 0.18      | 3.0  | 0.67      | No Retina + Anterior Segment Procedures        |           |                       |                 |
|                       | Retina Procedure Only to Anterior Segment Procedure                                                        | 3.7                        | 0.26      | 52   | 0.33      | 1.1                          | 0.12      | 9.2  | 0.96      | 0.73                                           | 0.090     | 5.9                   | 0.76            |
|                       | Retina Procedure Only to Glaucoma-Related Surgery ± Anterior Segment Surgery                               | 1.6                        | 0.18      | 13   | 0.68      | 0.50                         | 0.059     | 4.2  | 0.52      | 7.2                                            | 0.82      | 63                    | 0.075           |
|                       | Retina + Anterior Segment Procedure to Anterior Segment Procedure                                          | 1.9                        | 0.13      | 28   | 0.63      | 1.4                          | 0.14      | 14   | 0.76      | No Retina + Anterior Segment Procedure Failure |           |                       |                 |
|                       | Retina + Anterior Segment Procedure to Glaucoma-Related Surgery ± Anterior Segment Surgery                 | 0.82                       | 0.090     | 7.3  | 0.86      | 0.68                         | 0.069     | 6.7  | 0.74      | No Retina + Anterior Segment Procedure Failure |           |                       |                 |
|                       | Anterior Segment Procedure to Glaucoma-Related Surgery ± Anterior Segment Surgery                          | 0.42                       | 0.020     | 8.5  | 0.57      | 0.47                         | 0.028     | 7.8  | 0.60      | 9.9                                            | 0.96      | 10 x 10 <sup>^1</sup> | 0.054           |
| Type of Glaucoma      | Glaucoma following cataract surgery vs. Glaucoma associated with non-acquired systemic disease or syndrome | 3.0                        | 0.67      | 13   | 0.15      | 0.53                         | 0.13      | 2.1  | 0.36      | 2.4                                            | 0.060     | 93                    | 0.63            |

| Variable        | Groups Compared                                                                                                               | First-Time GDD Failure |           |                      |                 | First-Time GDD Complications |           |      |           | Second-Time GDD Failure                                                |           |                      |           |
|-----------------|-------------------------------------------------------------------------------------------------------------------------------|------------------------|-----------|----------------------|-----------------|------------------------------|-----------|------|-----------|------------------------------------------------------------------------|-----------|----------------------|-----------|
|                 |                                                                                                                               | Hazard Ratio           | HR 95% CI |                      | p - value       | Hazard Ratio                 | HR 95% CI |      | p - value | Hazard Ratio                                                           | HR 95% CI |                      | p - value |
|                 |                                                                                                                               |                        | low       | high                 |                 |                              | low       | high |           |                                                                        | low       | high                 |           |
|                 | Glaucoma following cataract surgery vs. Glaucoma associated with non-acquired ocular anomalies                                | 2.9                    | 0.68      | 12                   | 0.15            | 1.0                          | 0.34      | 3.0  | 0.99      | 34                                                                     | 0.47      | 25 x 10 <sup>2</sup> | 0.11      |
|                 | Glaucoma following cataract surgery vs. Glaucoma associated with acquired condition                                           | 0.24                   | 0.040     | 1.3                  | 0.10            | 0.74                         | 0.27      | 2.0  | 0.56      | No Failures with diagnosis Glaucoma associated with acquired condition |           |                      |           |
|                 | Glaucoma following cataract surgery vs. Primary Congenital Glaucoma                                                           | 1.3                    | 0.37      | 4.7                  | 0.67            | 0.64                         | 0.24      | 1.7  | 0.37      | 0.98                                                                   | 0.020     | 49                   | 0.99      |
|                 | Glaucoma following cataract surgery vs. Juvenile Open Angle Glaucoma                                                          | 4.4                    | 0.24      | 81                   | 0.32            | 1.3                          | 0.15      | 12   | 0.79      | No Failures with diagnosis Juvenile Open Angle Glaucoma                |           |                      |           |
|                 | Glaucoma associated with non-acquired systemic disease or syndrome vs. Glaucoma associated with non-acquired ocular anomalies | 0.97                   | 0.21      | 4.6                  | 0.97            | 1.9                          | 0.46      | 8.0  | 0.37      | 14                                                                     | 0.51      | 39 x 10 <sup>1</sup> | 0.12      |
|                 | Glaucoma associated with acquired condition vs. Glaucoma associated with non-acquired systemic disease or syndrome            | 12                     | 2.0       | 74                   | <b>0.0063**</b> | 0.71                         | 0.18      | 2.9  | 0.63      | No Failures with diagnosis Glaucoma associated with acquired condition |           |                      |           |
|                 | Glaucoma associated with non-acquired systemic disease or syndrome vs. Primary Congenital Glaucoma                            | 0.44                   | 0.11      | 1.8                  | 0.25            | 1.2                          | 0.31      | 4.7  | 0.78      | 0.40                                                                   | 0.020     | 7.9                  | 0.55      |
|                 | Glaucoma associated with non-acquired systemic disease or syndrome vs. Juvenile Open Angle Glaucoma                           | 1.5                    | 0.080     | 29                   | 0.80            | 2.6                          | 0.23      | 29   | 0.45      | No Failures with diagnosis Juvenile Open Angle Glaucoma                |           |                      |           |
|                 | Glaucoma associated with acquired condition vs. Glaucoma associated with non-acquired ocular anomalies                        | 12                     | 2.0       | 68                   | <b>0.0054**</b> | 1.4                          | 0.46      | 4.1  | 0.58      | No Failures with diagnosis Glaucoma associated with acquired condition |           |                      |           |
|                 | Glaucoma associated with non-acquired ocular anomalies vs. Primary Congenital Glaucoma                                        | 0.45                   | 0.12      | 1.7                  | 0.25            | 0.63                         | 0.22      | 1.8  | 0.39      | 0.030                                                                  | 0.00      | 1.0                  | 0.053     |
|                 | Glaucoma associated with non-acquired ocular anomalies vs. Juvenile Open Angle Glaucoma                                       | 1.5                    | 0.080     | 29                   | 0.78            | 1.3                          | 0.14      | 13   | 0.80      | No Failures with diagnosis Juvenile Open Angle Glaucoma                |           |                      |           |
|                 | Glaucoma associated with acquired condition vs. Primary Congenital Glaucoma                                                   | 5.4                    | 1.1       | 27                   | <b>0.041**</b>  | 1.2                          | 0.43      | 3.2  | 0.77      | No Failures with diagnosis Glaucoma associated with acquired condition |           |                      |           |
|                 | Glaucoma associated with acquired condition vs. Juvenile Open Angle Glaucoma                                                  | 18                     | 0.83      | 39 x 10 <sup>1</sup> | 0.066           | 1.8                          | 0.20      | 17   | 0.60      | No Failures with diagnosis Juvenile Open Angle Glaucoma                |           |                      |           |
|                 | Primary Congenital Glaucoma vs. Juvenile Open Angle Glaucoma                                                                  | 3.4                    | 0.19      | 59                   | 0.41            | 2.1                          | 0.23      | 19   | 0.51      | No Failures with diagnosis Juvenile Open Angle Glaucoma                |           |                      |           |
| Phakic Status   | No to Yes                                                                                                                     | 1.4                    | 0.61      | 3.4                  | 0.40            | 0.95                         | 0.49      | 1.8  | 0.87      | 0.64                                                                   | 0.13      | 3.1                  | 0.58      |
| Type of Implant | Ahmed to Baerveldt                                                                                                            | 0.82                   | 0.33      | 2.0                  | 0.66            | 1.4                          | 0.62      | 3.4  | 0.40      | 1.6                                                                    | 0.13      | 20                   | 0.72      |
| Tube Location   | Anterior Chamber to Sulcus                                                                                                    | 1.5                    | 0.36      | 6.1                  | 0.59            | 0.85                         | 0.25      | 2.9  | 0.80      | 7.2                                                                    | 0.65      | 79                   | 0.11      |

| Variable                                     | Groups Compared                              | First-Time GDD Failure |           |      |                | First-Time GDD Complications |           |      |                | Second-Time GDD Failure |           |                       |                 |
|----------------------------------------------|----------------------------------------------|------------------------|-----------|------|----------------|------------------------------|-----------|------|----------------|-------------------------|-----------|-----------------------|-----------------|
|                                              |                                              | Hazard Ratio           | HR 95% CI |      | p - value      | Hazard Ratio                 | HR 95% CI |      | p - value      | Hazard Ratio            | HR 95% CI |                       | p - value       |
|                                              |                                              |                        | low       | high |                |                              | low       | high |                |                         | low       | high                  |                 |
|                                              | Anterior Chamber to Pars Plana               | 0.79                   | 0.30      | 2.1  | 0.65           | 0.74                         | 0.33      | 1.7  | 0.47           | 2.4                     | 0.39      | 14                    | 0.35            |
|                                              | Sulcus to Pars Plana                         | 0.54                   | 0.11      | 2.5  | 0.43           | 0.87                         | 0.22      | 3.4  | 0.84           | 0.33                    | 0.020     | 4.5                   | 0.41            |
| Age Less than 1 Year Old                     | Older to Younger Age                         | 1.6                    | 0.67      | 3.8  | 0.29           | 1.7                          | 0.89      | 3.3  | 0.10           | 27                      | 2.7       | 27 x 10 <sup>^1</sup> | <b>0.0053**</b> |
| Age Less than 2 Years Old                    | Older to Younger Age                         | 2.2                    | 0.89      | 5.3  | 0.088          | 1.9                          | 1.0       | 3.7  | <b>0.046**</b> | 1.7                     | 0.27      | 10                    | 0.58            |
| Age Less than 3 Years Old                    | Older to Younger Age                         | 2.0                    | 1.0       | 4.9  | 0.14           | 2.1                          | 1.1       | 4.0  | <b>0.024**</b> | 0.98                    | 0.22      | 4.4                   | 0.98            |
| Continuous Variables                         | Hazard Ratio is for this many units increase |                        |           |      |                |                              |           |      |                |                         |           |                       |                 |
| Age at Surgery                               | Unit = 3 Years                               | 0.77                   | 0.61      | 0.98 | <b>0.034**</b> | 0.87                         | 0.73      | 1.0  | 0.14           | 0.94                    | 0.61      | 1.5                   | 0.78            |
| Pre-Operative IOP                            | Unit = 5 mmHg                                | 1.2                    | 0.97      | 1.5  | 0.086          | 1.2                          | 1.0       | 1.5  | <b>0.038**</b> | 0.68                    | 0.39      | 1.2                   | 0.17            |
| Pre-Operative Number of Glaucoma Medications | Unit = 1 medication                          | 0.74                   | 0.51      | 1.1  | 0.11           | 1.0                          | 0.72      | 1.5  | 0.87           | 0.89                    | 0.53      | 1.5                   | 0.67            |
| Vision at Surgery (LogMar)                   | Unit = 1 logMar                              | 1.5                    | 0.73      | 3.2  | 0.26           | 1.1                          | 0.49      | 2.3  | 0.89           | 2.6                     | 0.53      | 13                    | 0.24            |

**Footnote:**

- A p-value < 0.05 was considered statistically significant (\*\*)
- The single Molteno tube in the study was removed from analyses comparing Ahmed to Baerveldt, but included elsewhere.
